# Supplementary material
Source: publisher figshare collection journal article supplement (https://rs.figshare.com/ndownloader/files/14120591)
Supplement: Supplementary file 1 [file 14120591]

## Sheet: Larva eating timing
3		time eating	time not eating	4		time eating	time not eating	5		time eating	time not eating	6		time eating	time not eating	7		time eating	time not eating	8		time eating	time not eating	9		time eating	time not eating
0.416667	0			0.416667	0			0.45	0			0.283333	0			0.266667	0			0.2	0			0.2	0
0.5	0		0.0833333	5.51667	0		5.1	3.23333	0		2.78333	1.25	0		0.966667	9.9	0		9.63333	18.5167	0		18.3167	19.35	0		19.15
0.5	1			5.51667	1			3.23333	1			1.25	1			9.9	1			18.5167	1			19.35	1
6.6	1	6.1		9.83333	1	4.31667		3.31667	1	0.0833333		9.38333	1	8.13333		52.7833	1	42.8833		28.8667	1	10.35		26.6	1	7.25
6.6	0			9.83333	0			3.31667	0			9.38333	0			52.7833	0			28.8667	0			26.6	0
6.91667	0		0.316667	63.3833	0		53.55	6.93333	0		3.61667	9.73333	0		0.35	53.2667	0		0.483333	32.9667	0		4.1	36.9167	0		10.3167
6.91667	1							6.93333	1			9.73333	1			53.2667	1			32.9667	1			36.9167	1
11.4167	1	4.5						7.05	1	0.116667		9.81667	1	0.0833333		53.45	1	0.183333		35.75	1	2.78333		60.2	1	23.2833
11.4167	0							7.05	0			9.81667	0			53.45	0			35.75	0			60.2	0
11.9667	0		0.55					12.95	0		5.9	10.95	0		1.13333	53.7167	0		0.266667	63.3833	0		27.6333	63.3833	0		3.18333
11.9667	1							12.95	1			10.95	1			53.7167	1			63.3833	1			63.3833	1
18.2333	1	6.26667						25.6	1	12.65		17.2	1	6.25		58.3667	1	4.65
18.2333	0							25.6	0			17.2	0			58.3667	0
18.7833	0		0.55					25.8167	0		0.216667	17.45	0		0.25	59.1833	0		0.816667
18.7833	1							25.8167	1			17.45	1			59.1833	1
19.4667	1	0.683333						27.3667	1	1.55		18.9	1	1.45		63.3833	1	4.2
19.4667	0							27.3667	0			18.9	0
21.5667	0		2.1					28.35	0		0.983333	19.1667	0		0.266667
21.5667	1							28.35	1			19.1667	1
21.8333	1	0.266667						29.4	1	1.05		19.35	1	0.183333
21.8333	0							29.4	0			19.35	0
22.9833	0		1.15					30.0833	0		0.683333	20.0833	0		0.733333
22.9833	1							30.0833	1			20.0833	1
23.25	1	0.266667						49.7167	1	19.6333		21.8	1	1.71667
23.25	0							49.7167	0			21.8	0
24.25	0		1					55.0167	0		5.3	29.5833	0		7.78333
24.25	1							55.0167	1			29.5833	1
26.1	1	1.85						57.7667	1	2.75		30.45	1	0.866667
26.1	0							57.7667	0			30.45	0
28.3	0		2.2					57.8667	0		0.1	32.6	0		2.15
28.3	1							57.8667	1			32.6	1
29.5333	1	1.23333						63.3833	1	5.51667		33	1	0.4
29.5333	0							63.3833	0			33	0
34.04	0											63.3833	0		30.3833
34.04	1											63.3833	1
34.3667	1	0.326667
34.3667	0
37.9167	0		3.55
37.9167	1
39.1833	1	1.26667
39.1833	0
40.0167	0		0.833333
40.0167	1
43.1167	1	3.1
43.1167	0
46.4833	0		3.36667
46.4833	1
49.3667	1	2.88333
49.3667	0
50.1333	0		0.766667
50.1333	1
53.7167	1	3.58333
53.7167	0
54.2833	0		0.566667
54.2833	1
55.6167	1	1.33333
55.6167	0
57.3167	0		1.7
57.3167	1
57.7333	1	0.416667
57.7333	0
63.3833	0		5.65
	average	2.27178			average	4.31667			average	5.41875			average	2.38542			average	12.9792			average	6.56667			average	15.2667
	stdev	2.05801			stdev	#DIV/0!			stdev	7.09234			stdev	3.06345			stdev	20.037			stdev	5.35044			stdev	11.3373
	total fraction	0.537628			total fraction	0.0681041			total fraction	0.683934			total fraction	0.301078			total fraction	0.81909			total fraction	0.207205			total fraction	0.481725
average frac	0.442681
stdev	0.266532
average time eating	4.91025
stdev	7.96945
average time not eating	5.46667
stdev	10.1396

## Sheet: larva size
Larva length
13.7	mm
Larva width
4.3	mm
larva height
3.2	mm
100 larvae weight	8.88	g

## Sheet: PIV data M
Top view experiments
number	Larvae per minute, 1500 seconds	1000 seconds	500 seconds		difference 1500-1000	difference 1500-500			a	0.0075		Volume fraction
500	6.3602	11.4612							b	64.337		175	cm^3
1000	46.4328	38.5204	53.6999		-7.9124	7.2671						1000	larvae
3000	102.179	100.339	95.4839		-1.84	-6.6947						0.0987047	cm^3/larva
5000	126.165	128.762	126.599		2.5963	0.4336						98.7047	cm^3
10000	125.207	119.381	114.766		-5.8256	-10.4404						0.564027	phi
Top and bottom view experiment
	del.V	A	vorticity (1/s)	speed (mm/s)
bottom	-0.0017	0.006	-0.0006	0.07
top	0.0014	0.0077	0.0009	0.09
Size	mm	cm
L	13.7	1.37	0.0137
W	4.3	0.43	0.0043
h	3.2	0.32	0.0032

## Sheet: Group feeding raw data (4)
Control								10 larvae data		10 mean	0.0269986	g/hour	6.47966	larva weights per day					a	0.0516
Initial mass (g)	Mass after 30 minutes	Evaporation, 30 minutes						0.0119675		10 stdev	0.0173374	g/hour	1.62211	larva weights per day					b	0
9.534	9.516	0.00188798	1/initial weight					0.0230627											c	2e-05
								0.0459655											d	67.588
trial 1																			Intersection	1310.35
# Larvae	0	5	30	evaporation	Eating rate, grams per minute	Eating rate, grams per hour	eating rate in larva weights per day
10	8.031		7.956	0.0151624	0.00199459	0.119675	1.19675
10	7.779		7.649	0.0146866	0.00384378	0.230627	2.30627
10	8.566		8.32	0.0161724	0.00766092	0.459655	4.59655
100	9.192		7.784	0.0173543	0.0463549	2.78129	27.8129
100	8.915		6.354	0.0168313	0.0848056	5.08834	12.212
100	9.695		8.302	0.018304	0.0458232	2.74939	6.59854
200	6.138		3	0.0115884	0.104214	6.25282	7.50339
200	6.134		3.2222	0.0115809	0.096674	5.80044	6.96053
200	8.143		5.16	0.0153738	0.0989209	5.93525	7.1223
500	7.025		1.223	0.0132631	0.192958	11.5775	5.55719
500	9.323		2.762	0.0176016	0.218113	13.0868	6.28166
500	7.95		1.6888	0.0150094	0.208206	12.4924	5.99634
500	8.361	6.2944		0.0026309	0.412794	24.7676	11.8885
500	10.581	4.567		0.00332945	1.20213	72.128	34.6215
500	10.71	8.47		0.00337004	0.447326	26.8396	12.883
1000	9.71	7.63		0.00305538	0.415389	24.9233	5.9816
5000	8.652	2.1731		0.00272247	1.29524	77.7141	3.73028
10000	9.579	1.6727		0.00301416	1.58066	94.8394	2.27615
2500	11.417	4.867		0.00359251	1.30928	78.5569	7.54146
5000	15.819	0.69		0.00497766	3.0248	181.488	8.71144
2000	10.435	8.265		0.00328351	0.433343	26.0006	3.12007
10000	11.856	8.5021		0.00373065	0.670034	40.202	0.964849
15000	15.212	11.2594		0.00478666	0.789563	47.3738	0.75798
30000	17.717	9.1442		0.00557489	1.71345	102.807	0.822454
58000	12.749	8.63		0.00401164	0.822998	49.3799	0.20433
3000	9.94	8.05		0.00312775	0.377374	22.6425	1.8114
Area, ellipse	10.8071	mm^2
Nmax, ellipsoid	336.824
Eating rate of 10 larvae
0.0269986	grams/hour
Single larva
R	0.44
1/R	2.27273
PIV data
N'	2853.33
PIV calculations
number	L/min	Total	Eating rate
500	6.3602	368.625	9.95235
1000	46.4328	568.988	15.3619
2853.33		765.509	20.6676
3000	102.179	765.509	20.6676
5000	126.165	765.509	20.6676
10000	125.207	765.509	20.6676
58000		765.509	20.6676
Model
num larvae	eating rate
1	0.0269986
10	0.269986
50	1.34993
150	4.04979
336.824	9.09377
500	9.95235
1000	15.3619
2853.33	20.6676
3000	20.6676
5000	20.6676
10000	20.6676
58000	20.6676

## Sheet: orange calculations
A1	1143.16	mm
A2	1065.34	1190.67	mm
A3	590.151	mm
total area	4067.13	mm
Flat length	51
arc length	57
